# Supplementary material
Source: Elsevier journal article supplement (https://lshtm-eprints-repo-prod.lshtm-eprints.cdl.cosector.com/427523/1/mmc1.pdf)
Supplement: mmc1 [file mmc1.pdf]

Table S1: Crude mortality rates by baseline eGFR and ethnicity, and crude and adjusted associations of eGFR with all-cause mortality stratified by ethnicity

| eGFR<br>(ml/min/1.73m <sup>2</sup> ) | Events/PYs | Black                |         |                          |         | White/other          |                   |                          |                   |        |
|--------------------------------------|------------|----------------------|---------|--------------------------|---------|----------------------|-------------------|--------------------------|-------------------|--------|
|                                      |            | Crude<br>HR (95% CI) | p-value | Adjusted*<br>HR (95% CI) | p-value | Crude<br>HR (95% CI) | p-value           | Adjusted*<br>HR (95% CI) | p-value           |        |
| ≥105                                 | 158/12692  | 1.44 (1.04, 1.98)    | 0.03    | 1.53 (1.08, 2.18)        | 0.02    | 545/28693            | 1.20 (1.06, 1.36) | 0.01                     | 1.53 (1.32, 1.77) | <0.001 |
| 90-104                               | 48/5639    | reference            |         | reference                |         | 454/29223            | reference         |                          | reference         |        |
| 60-89                                | 59/4261    | 1.63 (1.11, 2.38)    | 0.01    | 1.47 (0.97, 2.22)        | 0.07    | 461/29577            | 1.01 (0.89, 1.15) | 0.87                     | 0.88 (0.76, 1.02) | 0.09   |
| 45-59                                | 14/211     | 7.56 (4.23, 13.5)    | <0.001  | 4.17 (2.42, 7.18)        | <0.001  | 42/1254              | 2.17 (1.56, 3.01) | <0.001                   | 1.09 (0.73, 1.62) | 0.67   |
| 30-44                                | 3/59       | 5.17 (1.58, 17.0)    | 0.01    | 2.16 (0.68, 6.84)        | 0.19    | 12/198               | 3.83 (2.08, 7.06) | <0.001                   | 1.84 (1.12, 3.02) | 0.02   |
| <30                                  | 13/147     | 9.23 (5.03, 16.9)    | <0.001  | 4.67 (2.36, 9.24)        | <0.001  | 11/113               | 5.78 (3.16, 10.6) | <0.001                   | 3.00 (1.11, 8.10) | 0.03   |

\*Adjusted for age, gender, risk group, years since entry into the cohort, and CD4 cell count, HIV RNA level, cART use, AIDS, HBsAg and HCV Ab status as time-updated covariates

cART, combination antiretroviral therapy; HBsAg, hepatitis B surface antigen; HCV Ab, hepatitis C antibody; eGFR, estimated glomerular filtration rate; CI, confidence intervals; HR, hazard ratio; PYs, person years of follow-up
